# Supplementary material for: Dendropanax Morbiferus and Other Species from the Genus Dendropanax: Therapeutic Potential of Its Traditional Uses, Phytochemistry, and Pharmacology
Source: PubMed Central journal article supplement (PMC7601828; doi:10.3390/antiox9100962), 2020-10-08
Supplement: antioxidants-09-00962-s001.pdf [file antioxidants-09-00962-s001.pdf]

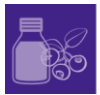

1 Supplementary material

2

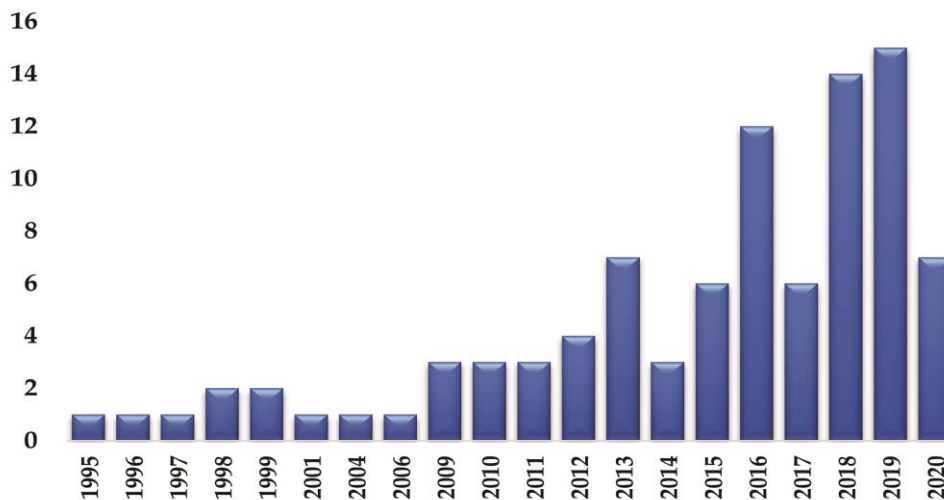

3

4 **Figure S1.** The total number of *Dendropanax* genus-related publications registered in Pub Med literature  
5 database. The y-axis shows the crude total numbers of full-length articles in PubMed. The x-axis shows the  
6 year articles first appeared on PubMed.

7

8

9

10

**Table S1.** Phytochemical constituents identified from *Dendropanax* species

| Serial. No                                     | Compound                                      | Molecular Formula                              | Plant              | Plant Part | Extraction method | Content in the extract | References |
|------------------------------------------------|-----------------------------------------------|------------------------------------------------|--------------------|------------|-------------------|------------------------|------------|
| <i>D. arboreus</i>                             |                                               |                                                |                    |            |                   |                        |            |
| 1                                              | Falcarinol                                    | C <sub>17</sub> H <sub>22</sub> O              | <i>D. arboreus</i> | Leaves     | Methanol          | 500 mg/488g            | [1]        |
| 2                                              | Cis-1,9,16-heptadecatriene-4,6-diyne-3,8-diol | C <sub>17</sub> H <sub>22</sub> O <sub>2</sub> | <i>D. arboreus</i> | Leaves     | 80% Ethanol       | 112 mg/322g            | [2]        |
| 3                                              | Dehydrofalcarindiol                           | C <sub>17</sub> H <sub>22</sub> O <sub>2</sub> | <i>D. arboreus</i> | Leaves     | Methanol          | 43 mg/488g             | [1]        |
| 4                                              | Dehydrofalcarinol                             | C <sub>17</sub> H <sub>22</sub> O              | <i>D. arboreus</i> | Leaves     | Methanol          | 30 mg/488g             | [1]        |
| 5                                              | Falcarindiol                                  | C <sub>17</sub> H <sub>24</sub> O <sub>2</sub> | <i>D. arboreus</i> | Leaves     | Methanol          | 26 mg/488g             | [1]        |
| 6                                              | (3S)-Diyne                                    | C <sub>17</sub> H <sub>22</sub> O              | <i>D. arboreus</i> | Leaves     | Methanol          | 21 mg/488g             | [1]        |
| 7                                              | (3S)-16,17-Didehydrofalcarinol                | C <sub>17</sub> H <sub>22</sub> O              | <i>D. arboreus</i> | Leaves     | Methanol          | 7.4mg/488g             | [1]        |
| 8                                              | Dendroarboreols A                             | C <sub>17</sub> H <sub>22</sub> O <sub>2</sub> | <i>D. arboreus</i> | Leaves     | Methanol          | 1.8 mg/488g            | [1]        |
| 9                                              | Dendroarboreols B                             | C <sub>17</sub> H <sub>22</sub> O <sub>2</sub> | <i>D. arboreus</i> | Leaves     | Methanol          | 1.8 mg/488g            | [1]        |
| (% of constituent of the essential oil (2 mg)) |                                               |                                                |                    |            |                   |                        |            |
| 10                                             | valerianol                                    | C <sub>15</sub> H <sub>26</sub> O              | <i>D. arboreus</i> | Leaves     | Essential oils    | 21.2 %                 | [3]        |
| 11                                             | γ-eudesmol                                    | C <sub>15</sub> H <sub>26</sub> O              | <i>D. arboreus</i> | Leaves     | Essential oils    | 16.3 %                 | [3]        |
| 12                                             | Germacrene B                                  | C <sub>15</sub> H <sub>24</sub>                | <i>D. arboreus</i> | Leaves     | Essential oils    | 8.8 %                  | [3]        |
| 13                                             | 14-hydroxy-α-muurolene                        | C <sub>15</sub> H <sub>24</sub> O              | <i>D. arboreus</i> | Leaves     | Essential oils    | 5.2 %                  | [3]        |
| 14                                             | Khusinol                                      | C <sub>15</sub> H <sub>24</sub> O              | <i>D. arboreus</i> | Leaves     | Essential oils    | 4.3 %                  | [3]        |
| 15                                             | δ-Cadinene                                    | C <sub>15</sub> H <sub>24</sub>                | <i>D. arboreus</i> | Leaves     | Essential oils    | 3.8 %                  | [3]        |
| 16                                             | γ-Elemene                                     | C <sub>15</sub> H <sub>24</sub>                | <i>D. arboreus</i> | Leaves     | Essential oils    | 1.8 %                  | [3]        |
| 17                                             | Trans-β-guaiene                               | C <sub>15</sub> H <sub>24</sub>                | <i>D. arboreus</i> | Leaves     | Essential oils    | 1.4 %                  | [3]        |
| 18                                             | Germacrene D                                  | C <sub>15</sub> H <sub>24</sub>                | <i>D. arboreus</i> | Leaves     | Essential oils    | 1.3 %                  | [3]        |
| 19                                             | Valencene                                     | C <sub>15</sub> H <sub>24</sub>                | <i>D. arboreus</i> | Leaves     | Essential oils    | 1.1 %                  | [3]        |
| 21                                             | γ-Muurolene                                   | C <sub>15</sub> H <sub>24</sub>                | <i>D. arboreus</i> | Leaves     | Essential oils    | 1.1 %                  | [3]        |

|    |                                |                                                |                    |        |                |        |     |
|----|--------------------------------|------------------------------------------------|--------------------|--------|----------------|--------|-----|
| 22 | $\beta$ -Bourbonene            | C <sub>15</sub> H <sub>24</sub>                | <i>D. arboreus</i> | Leaves | Essential oils | 0.7 %  | [3] |
| 23 | (E)-2-decenal                  | C <sub>10</sub> H <sub>18</sub> O              | <i>D. arboreus</i> | Leaves | Essential oils | 0.4 %  | [3] |
| 24 | $\beta$ -Gurjunene             | C <sub>15</sub> H <sub>24</sub>                | <i>D. arboreus</i> | Leaves | Essential oils | 0.4 %  | [3] |
| 25 | Khusinol acetate               | C <sub>17</sub> H <sub>26</sub> O <sub>2</sub> | <i>D. arboreus</i> | Leaves | Essential oils | 0.3 %  | [3] |
| 26 | 14-hydroxy- $\delta$ -cadinene | C <sub>15</sub> H <sub>24</sub> O              | <i>D. arboreus</i> | Leaves | Essential oils | 0.2 %  | [3] |
| 27 | Octanol                        | C <sub>8</sub> H <sub>18</sub> O               | <i>D. arboreus</i> | Leaves | Essential oils | 0.2 %  | [3] |
| 28 | <i>trans</i> -Verbenol         | C <sub>10</sub> H <sub>16</sub> O              | <i>D. arboreus</i> | Leaves | Essential oils | 0.2 %  | [3] |
| 29 | Myrtenol                       | C <sub>10</sub> H <sub>16</sub> O              | <i>D. arboreus</i> | Leaves | Essential oils | 0.2 %  | [3] |
| 30 | Hexadecanoic acid              | C <sub>16</sub> H <sub>32</sub> O <sub>2</sub> | <i>D. arboreus</i> | Leaves | Essential oils | 0.2 %  | [3] |
| 31 | Isovaleraldehyde               | C <sub>5</sub> H <sub>10</sub> O               | <i>D. arboreus</i> | Leaves | Essential oils | <0.1 % | [3] |
| 32 | Methyl crotonate               | C <sub>5</sub> H <sub>8</sub> O <sub>2</sub>   | <i>D. arboreus</i> | Leaves | Essential oils | <0.1 % | [3] |
| 33 | Isoamyl alcohol                | C <sub>5</sub> H <sub>12</sub> O               | <i>D. arboreus</i> | Leaves | Essential oils | <0.1 % | [3] |
| 34 | 2-methyl-2-butenal             | C <sub>5</sub> H <sub>8</sub> O                | <i>D. arboreus</i> | Leaves | Essential oils | <0.1 % | [3] |
| 35 | Hexanal                        | C <sub>6</sub> H <sub>12</sub> O               | <i>D. arboreus</i> | Leaves | Essential oils | <0.1 % | [3] |
| 36 | Furfural                       | C <sub>5</sub> H <sub>4</sub> O <sub>2</sub>   | <i>D. arboreus</i> | Leaves | Essential oils | <0.1 % | [3] |
| 37 | (Z)-2-Hexenal                  | C <sub>6</sub> H <sub>10</sub> O               | <i>D. arboreus</i> | Leaves | Essential oils | <0.1 % | [3] |
| 38 | Hexanol                        | C <sub>6</sub> H <sub>14</sub> O               | <i>D. arboreus</i> | Leaves | Essential oils | <0.1 % | [3] |
| 39 | 2-Heptanone                    | C <sub>7</sub> H <sub>14</sub> O               | <i>D. arboreus</i> | Leaves | Essential oils | <0.1 % | [3] |
| 40 | 2-Heptanol                     | C <sub>7</sub> H <sub>16</sub> O               | <i>D. arboreus</i> | Leaves | Essential oils | <0.1 % | [3] |
| 41 | Heptanal                       | C <sub>7</sub> H <sub>14</sub> O               | <i>D. arboreus</i> | Leaves | Essential oils | <0.1 % | [3] |
| 42 | (E, E)-2,4-hexadienal          | C <sub>6</sub> H <sub>8</sub> O                | <i>D. arboreus</i> | Leaves | Essential oils | <0.1 % | [3] |
| 43 | $\alpha$ -Thujene              | C <sub>10</sub> H <sub>16</sub>                | <i>D. arboreus</i> | Leaves | Essential oils | <0.1 % | [3] |
| 44 | Camphene                       | C <sub>10</sub> H <sub>16</sub>                | <i>D. arboreus</i> | Leaves | Essential oils | <0.1 % | [3] |
| 45 | Thuja-2,4(10)-diene            | C <sub>10</sub> H <sub>14</sub>                | <i>D. arboreus</i> | Leaves | Essential oils | <0.1 % | [3] |
| 46 | Benzaldehyde                   | C <sub>7</sub> H <sub>6</sub> O                | <i>D. arboreus</i> | Leaves | Essential oils | <0.1 % | [3] |
| 47 | Heptanol                       | C <sub>7</sub> H <sub>16</sub> O               | <i>D. arboreus</i> | Leaves | Essential oils | <0.1 % | [3] |

|    |                         |                                               |                    |        |                |        |     |
|----|-------------------------|-----------------------------------------------|--------------------|--------|----------------|--------|-----|
| 48 | Sabinene                | C <sub>10</sub> H <sub>16</sub>               | <i>D. arboreus</i> | Leaves | Essential oils | <0.1 % | [3] |
| 49 | 6-methyl-5-hepten-2-one | C <sub>8</sub> H <sub>14</sub> O              | <i>D. arboreus</i> | Leaves | Essential oils | <0.1 % | [3] |
| 50 | Octanal                 | C <sub>8</sub> H <sub>16</sub> O              | <i>D. arboreus</i> | Leaves | Essential oils | <0.1 % | [3] |
| 51 | α-Phellandrene          | C <sub>10</sub> H <sub>16</sub>               | <i>D. arboreus</i> | Leaves | Essential oils | <0.1 % | [3] |
| 52 | (E, E)-2,4-Heptadienal  | C <sub>7</sub> H <sub>10</sub> O              | <i>D. arboreus</i> | Leaves | Essential oils | <0.1 % | [3] |
| 53 | α-Terpinene             | C <sub>10</sub> H <sub>16</sub>               | <i>D. arboreus</i> | Leaves | Essential oils | <0.1 % | [3] |
| 54 | p-Menth-1-ene           | C <sub>10</sub> H <sub>18</sub>               | <i>D. arboreus</i> | Leaves | Essential oils | <0.1 % | [3] |
| 55 | 1,8-Cineole             | C <sub>10</sub> H <sub>18</sub> O             | <i>D. arboreus</i> | Leaves | Essential oils | <0.1 % | [3] |
| 56 | (Z)-β-ocimene           | C <sub>10</sub> H <sub>16</sub>               | <i>D. arboreus</i> | Leaves | Essential oils | <0.1 % | [3] |
| 57 | (E)-β-ocimene           | C <sub>10</sub> H <sub>16</sub>               | <i>D. arboreus</i> | Leaves | Essential oils | <0.1 % | [3] |
| 58 | (E)-2-octenal           | C <sub>8</sub> H <sub>14</sub> O              | <i>D. arboreus</i> | Leaves | Essential oils | <0.1 % | [3] |
| 59 | γ-Terpinene             | C <sub>10</sub> H <sub>16</sub>               | <i>D. arboreus</i> | Leaves | Essential oils | <0.1 % | [3] |
| 60 | Heptanoic acid          | C <sub>7</sub> H <sub>14</sub> O <sub>2</sub> | <i>D. arboreus</i> | Leaves | Essential oils | <0.1 % | [3] |
| 61 | 2-nonanone              | C <sub>9</sub> H <sub>18</sub> O              | <i>D. arboreus</i> | Leaves | Essential oils | <0.1 % | [3] |
| 62 | Methyl benzoate         | C <sub>8</sub> H <sub>8</sub> O <sub>2</sub>  | <i>D. arboreus</i> | Leaves | Essential oils | <0.1 % | [3] |
| 63 | Nonanal                 | C <sub>9</sub> H <sub>18</sub> O              | <i>D. arboreus</i> | Leaves | Essential oils | <0.1 % | [3] |
| 64 | Isophorone              | C <sub>9</sub> H <sub>14</sub> O              | <i>D. arboreus</i> | Leaves | Essential oils | <0.1 % | [3] |
| 65 | α-Campholenal           | C <sub>10</sub> H <sub>16</sub> O             | <i>D. arboreus</i> | Leaves | Essential oils | <0.1 % | [3] |
| 66 | cis-Limonene oxide      | C <sub>10</sub> H <sub>16</sub> O             | <i>D. arboreus</i> | Leaves | Essential oils | <0.1 % | [3] |
| 67 | trans-Sabinol           | C <sub>10</sub> H <sub>16</sub> O             | <i>D. arboreus</i> | Leaves | Essential oils | <0.1 % | [3] |
| 68 | (E)-2-Nonenal           | C <sub>9</sub> H <sub>16</sub> O              | <i>D. arboreus</i> | Leaves | Essential oils | <0.1 % | [3] |
| 69 | Isopinocampone          | C <sub>10</sub> H <sub>16</sub> O             | <i>D. arboreus</i> | Leaves | Essential oils | <0.1 % | [3] |
| 70 | Terpinen-4-ol           | C <sub>10</sub> H <sub>18</sub> O             | <i>D. arboreus</i> | Leaves | Essential oils | <0.1 % | [3] |
| 71 | α-Terpineol             | C <sub>10</sub> H <sub>18</sub> O             | <i>D. arboreus</i> | Leaves | Essential oils | <0.1 % | [3] |
| 72 | Decanal                 | C <sub>10</sub> H <sub>20</sub> O             | <i>D. arboreus</i> | Leaves | Essential oils | <0.1 % | [3] |
| 73 | trans-Piperitol         | C <sub>10</sub> H <sub>18</sub> O             | <i>D. arboreus</i> | Leaves | Essential oils | <0.1 % | [3] |

|                           |                                    |                                                 |                    |        |                |              |     |
|---------------------------|------------------------------------|-------------------------------------------------|--------------------|--------|----------------|--------------|-----|
| 74                        | Verbenone                          | C <sub>10</sub> H <sub>14</sub> O               | <i>D. arboreus</i> | Leaves | Essential oils | <0.1 %       | [3] |
| 75                        | <i>trans</i> -Carveol              | C <sub>10</sub> H <sub>16</sub> O               | <i>D. arboreus</i> | Leaves | Essential oils | <0.1 %       | [3] |
| 76                        | Nerol                              | C <sub>10</sub> H <sub>18</sub> O               | <i>D. arboreus</i> | Leaves | Essential oils | <0.1 %       | [3] |
| 77                        | Cuminaldehyde                      | C <sub>10</sub> H <sub>12</sub> O               | <i>D. arboreus</i> | Leaves | Essential oils | <0.1 %       | [3] |
| 78                        | Carvone                            | C <sub>10</sub> H <sub>14</sub> O               | <i>D. arboreus</i> | Leaves | Essential oils | <0.1 %       | [3] |
| 79                        | Decanol                            | C <sub>10</sub> H <sub>22</sub> O               | <i>D. arboreus</i> | Leaves | Essential oils | <0.1 %       | [3] |
| 80                        | (E)-anethole                       | C <sub>10</sub> H <sub>12</sub> O               | <i>D. arboreus</i> | Leaves | Essential oils | <0.1 %       | [3] |
| 81                        | Bornyl acetate                     | C <sub>12</sub> H <sub>20</sub> O <sub>2</sub>  | <i>D. arboreus</i> | Leaves | Essential oils | <0.1 %       | [3] |
| 82                        | Safrole                            | C <sub>10</sub> H <sub>10</sub> O <sub>2</sub>  | <i>D. arboreus</i> | Leaves | Essential oils | <0.1 %       | [3] |
| 83                        | Thymol                             | C <sub>10</sub> H <sub>14</sub> O               | <i>D. arboreus</i> | Leaves | Essential oils | <0.1 %       | [3] |
| 84                        | (E, Z)-2,4-decadienal              | C <sub>10</sub> H <sub>16</sub> O               | <i>D. arboreus</i> | Leaves | Essential oils | <0.1 %       | [3] |
| 85                        | δ-Elemene                          | C <sub>15</sub> H <sub>24</sub>                 | <i>D. arboreus</i> | Leaves | Essential oils | <0.1 %       | [3] |
| 86                        | α-Cubebene                         | C <sub>15</sub> H <sub>24</sub>                 | <i>D. arboreus</i> | Leaves | Essential oils | <0.1 %       | [3] |
| 87                        | α-Ylangene                         | C <sub>15</sub> H <sub>24</sub>                 | <i>D. arboreus</i> | Leaves | Essential oils | <0.1 %       | [3] |
| 88                        | α-Copaene                          | C <sub>15</sub> H <sub>24</sub>                 | <i>D. arboreus</i> | Leaves | Essential oils | <0.1 %       | [3] |
| 89                        | β-Cubebene                         | C <sub>15</sub> H <sub>24</sub>                 | <i>D. arboreus</i> | Leaves | Essential oils | <0.1 %       | [3] |
| 90                        | β-Elemene                          | C <sub>15</sub> H <sub>24</sub>                 | <i>D. arboreus</i> | Leaves | Essential oils | <0.1 %       | [3] |
| 91                        | <i>trans</i> -β-guaiene            | C <sub>15</sub> H <sub>24</sub>                 | <i>D. arboreus</i> | Leaves | Essential oils | <0.1 %       | [3] |
| 92                        | γ-Cadinene                         | C <sub>15</sub> H <sub>24</sub>                 | <i>D. arboreus</i> | Leaves | Essential oils | <0.1 %       | [3] |
| 93                        | (E)-Phytyl acetate                 | C <sub>22</sub> H <sub>42</sub> O <sub>2</sub>  | <i>D. arboreus</i> | Leaves | Essential oils | <0.1 %       | [3] |
| 94                        | Dehydrofalconarindiol-A            | C <sub>17</sub> H <sub>22</sub> O <sub>2</sub>  | <i>D. arboreus</i> | Leaves | Essential oils | <0.1 %       | [3] |
| 95                        | Dehydrofalconarindiol-B            | C <sub>17</sub> H <sub>22</sub> O <sub>2</sub>  | <i>D. arboreus</i> | Leaves | Essential oils | <0.1 %       | [3] |
| <b><i>D. dentiger</i></b> |                                    |                                                 |                    |        |                |              |     |
| 96                        | Kaempferol 3- <i>O</i> -rutinoside | C <sub>27</sub> H <sub>30</sub> O <sub>15</sub> | <i>D. dentiger</i> | Leaves | 95% Ethanol    | 99 mg/207g   | [4] |
| 97                        | Sargentol                          | C <sub>17</sub> H <sub>24</sub> O <sub>10</sub> | <i>D. dentiger</i> | Leaves | 95% Ethanol    | 51.8 mg/207g | [4] |
| 98                        | Kelampayoside A                    | C <sub>20</sub> H <sub>30</sub> O <sub>13</sub> | <i>D. dentiger</i> | Leaves | 95% Ethanol    | 28.9 mg/207g | [4] |

|     |                                                      |                                                   |                    |        |             |              |     |
|-----|------------------------------------------------------|---------------------------------------------------|--------------------|--------|-------------|--------------|-----|
| 99  | Icariside F2                                         | C <sub>18</sub> H <sub>26</sub> O <sub>10</sub>   | <i>D. dentiger</i> | Leaves | 95% Ethanol | 25.4 mg/207g | [4] |
| 100 | Quercetin 3- <i>O</i> -robinobioside                 | C <sub>27</sub> H <sub>30</sub> O <sub>16</sub>   | <i>D. dentiger</i> | Leaves | 95% Ethanol | 13.6 mg/207g | [4] |
| 101 | Dhurrin                                              | C <sub>14</sub> H <sub>17</sub> NO <sub>7</sub>   | <i>D. dentiger</i> | Leaves | 95% Ethanol | 8.4 mg/207g  | [4] |
| 102 | Coniferin                                            | C <sub>16</sub> H <sub>22</sub> O <sub>8</sub>    | <i>D. dentiger</i> | Leaves | 95% Ethanol | 5.9 mg/207g  | [4] |
| 103 | 6'- <i>O</i> -Apiofuranosyl dendranthemoside A       | C <sub>24</sub> H <sub>41</sub> O <sub>12</sub>   | <i>D. dentiger</i> | Leaves | 95% Ethanol | 4.6 mg/207g  | [4] |
| 104 | β-D-glucopyranoside                                  | C <sub>7</sub> H <sub>14</sub> O <sub>6</sub>     | <i>D. dentiger</i> | Leaves | 95% Ethanol | 4.3 mg/207g  | [4] |
| 105 | Glucosyringic acid                                   | C <sub>15</sub> H <sub>20</sub> O <sub>10</sub>   | <i>D. dentiger</i> | Leaves | 95% Ethanol | 1.6 mg/207g  | [4] |
| 106 | 2-(β-D-Glucopyranosyl)-3-isoxazolin-5-one            | C <sub>9</sub> H <sub>13</sub> NO <sub>7</sub> Na | <i>D. dentiger</i> | Leaves | 95% Ethanol | 1.2 mg/207g  | [4] |
| 107 | 3-Methoxy-D-mannono-1,4-lactone                      | C <sub>7</sub> H <sub>12</sub> O <sub>6</sub> Na  | <i>D. dentiger</i> | Leaves | 95% Ethanol | 1.2 mg/207g  | [4] |
| 108 | Friedelan-3-one                                      | C <sub>30</sub> H <sub>50</sub> O                 | <i>D. dentiger</i> | Stems  | 80% Ethanol | N/A          | [5] |
| 109 | Glycerol monooleate                                  | C <sub>21</sub> H <sub>42</sub> O <sub>4</sub>    | <i>D. dentiger</i> | Stems  | 80% Ethanol | N/A          | [5] |
| 110 | Behenic acid                                         | C <sub>22</sub> H <sub>44</sub> O <sub>2</sub>    | <i>D. dentiger</i> | Stems  | 80% Ethanol | N/A          | [5] |
| 111 | 1-Triacontanol                                       | C <sub>30</sub> H <sub>62</sub> O                 | <i>D. dentiger</i> | Stems  | 80% Ethanol | N/A          | [5] |
| 112 | Stearic acid                                         | C <sub>18</sub> H <sub>36</sub> O <sub>2</sub>    | <i>D. dentiger</i> | Stems  | 80% Ethanol | N/A          | [5] |
| 113 | Syringaldehyde                                       | C <sub>9</sub> H <sub>10</sub> O <sub>4</sub>     | <i>D. dentiger</i> | Stems  | 80% Ethanol | N/A          | [5] |
| 114 | Coniferyl aldehyde                                   | C <sub>10</sub> H <sub>10</sub> O <sub>3</sub>    | <i>D. dentiger</i> | Stems  | 80% Ethanol | N/A          | [5] |
| 115 | Daucosterol                                          | C <sub>35</sub> H <sub>60</sub> O <sub>6</sub>    | <i>D. dentiger</i> | Stems  | 80% Ethanol | N/A          | [5] |
| 116 | Sinapaldehyde                                        | C <sub>11</sub> H <sub>12</sub> O <sub>4</sub>    | <i>D. dentiger</i> | Stems  | 80% Ethanol | N/A          | [5] |
| 117 | Luteolin                                             | C <sub>15</sub> H <sub>10</sub> O <sub>6</sub>    | <i>D. dentiger</i> | Stems  | 80% Ethanol | N/A          | [5] |
| 118 | Sinapaldehyde glucoside                              | C <sub>17</sub> H <sub>22</sub> O <sub>9</sub>    | <i>D. dentiger</i> | Stems  | 80% Ethanol | N/A          | [5] |
| 119 | ( <i>E</i> )-4-Hydroxycinnamic acid                  | C <sub>9</sub> H <sub>8</sub> O <sub>3</sub>      | <i>D. dentiger</i> | Stems  | 80% Ethanol | N/A          | [5] |
| 120 | ( <i>E</i> )-Cinnamic acid                           | C <sub>9</sub> H <sub>8</sub> O <sub>2</sub>      | <i>D. dentiger</i> | Stems  | 80% Ethanol | N/A          | [5] |
| 121 | (+)-syringaresinol-di- <i>O</i> -β-D-glucopyranoside | C <sub>34</sub> H <sub>46</sub> O <sub>18</sub>   | <i>D. dentiger</i> | Stems  | 80% Ethanol | N/A          | [5] |
| 122 | Eugenol rutinoside                                   | C <sub>22</sub> H <sub>32</sub> O <sub>11</sub>   | <i>D. dentiger</i> | Stems  | 80% Ethanol | N/A          | [5] |
| 123 | Icariside E5                                         | C <sub>26</sub> H <sub>34</sub> O <sub>11</sub>   | <i>D. dentiger</i> | Stems  | 80% Ethanol | N/A          | [5] |

*D. gonatopodus* (% of constituent of the essential oil (5.2 mg))

|     |                      |                                   |                       |        |                |        |     |
|-----|----------------------|-----------------------------------|-----------------------|--------|----------------|--------|-----|
| 124 | (E)-2-Hexenal        | C <sub>6</sub> H <sub>10</sub> O  | <i>D. gonatopodus</i> | leaves | Essential oils | 16.9 % | [6] |
| 125 | Terpinolene          | C <sub>10</sub> H <sub>16</sub>   | <i>D. gonatopodus</i> | leaves | Essential oils | 14.8 % | [6] |
| 126 | δ-Cadinene           | C <sub>15</sub> H <sub>24</sub>   | <i>D. gonatopodus</i> | leaves | Essential oils | 13.5 % | [6] |
| 127 | (E)-Caryophyllene    | C <sub>15</sub> H <sub>24</sub>   | <i>D. gonatopodus</i> | leaves | Essential oils | 9.9 %  | [6] |
| 128 | α-Copaene            | C <sub>15</sub> H <sub>24</sub>   | <i>D. gonatopodus</i> | leaves | Essential oils | 7.3 %  | [6] |
| 129 | <i>p</i> -Cymen-8-ol | C <sub>10</sub> H <sub>14</sub> O | <i>D. gonatopodus</i> | leaves | Essential oils | 5.2 %  | [6] |
| 130 | (E, E)-α-Farnesene   | C <sub>15</sub> H <sub>24</sub>   | <i>D. gonatopodus</i> | leaves | Essential oils | 4.5 %  | [6] |
| 131 | Germacrene-D         | C <sub>15</sub> H <sub>24</sub>   | <i>D. gonatopodus</i> | leaves | Essential oils | 3.9 %  | [6] |
| 132 | α-Pinene             | C <sub>10</sub> H <sub>16</sub>   | <i>D. gonatopodus</i> | leaves | Essential oils | 3.9 %  | [6] |
| 133 | α-Humulene           | C <sub>15</sub> H <sub>24</sub>   | <i>D. gonatopodus</i> | leaves | Essential oils | 3.0 %  | [6] |
| 134 | Myrcene              | C <sub>10</sub> H <sub>16</sub>   | <i>D. gonatopodus</i> | leaves | Essential oils | 3.0 %  | [6] |
| 135 | β-Pinene             | C <sub>10</sub> H <sub>16</sub>   | <i>D. gonatopodus</i> | leaves | Essential oils | 2.8 %  | [6] |
| 136 | Bicyclogermacrene    | C <sub>15</sub> H <sub>24</sub>   | <i>D. gonatopodus</i> | leaves | Essential oils | 2.5 %  | [6] |
| 137 | <i>p</i> -Cymene     | C <sub>10</sub> H <sub>14</sub>   | <i>D. gonatopodus</i> | leaves | Essential oils | 1.9 %  | [6] |
| 138 | Limonene             | C <sub>10</sub> H <sub>16</sub>   | <i>D. gonatopodus</i> | leaves | Essential oils | 1.8 %  | [6] |
| 139 | γ-Cadinene           | C <sub>15</sub> H <sub>24</sub>   | <i>D. gonatopodus</i> | leaves | Essential oils | 0.7 %  | [6] |
| 140 | Spathulenol          | C <sub>15</sub> H <sub>24</sub> O | <i>D. gonatopodus</i> | leaves | Essential oils | 0.6 %  | [6] |
| 141 | Globulol             | C <sub>15</sub> H <sub>26</sub> O | <i>D. gonatopodus</i> | leaves | Essential oils | 0.6 %  | [6] |
| 142 | α-Cadinol            | C <sub>15</sub> H <sub>26</sub> O | <i>D. gonatopodus</i> | leaves | Essential oils | 0.6 %  | [6] |
| 143 | τ-Cadinol            | C <sub>15</sub> H <sub>26</sub> O | <i>D. gonatopodus</i> | leaves | Essential oils | 0.5 %  | [6] |
| 144 | Mint sulfide         | C <sub>15</sub> H <sub>24</sub> S | <i>D. gonatopodus</i> | leaves | Essential oils | 0.4 %  | [6] |
| 145 | α-Calacorene         | C <sub>15</sub> H <sub>24</sub>   | <i>D. gonatopodus</i> | leaves | Essential oils | 0.4 %  | [6] |
| 146 | γ-Muurolole          | C <sub>15</sub> H <sub>24</sub>   | <i>D. gonatopodus</i> | leaves | Essential oils | 0.4 %  | [6] |
| 147 | Aromadendrene        | C <sub>15</sub> H <sub>24</sub>   | <i>D. gonatopodus</i> | leaves | Essential oils | 0.3 %  | [6] |
| 148 | Alloaromadendrene    | C <sub>15</sub> H <sub>24</sub>   | <i>D. gonatopodus</i> | leaves | Essential oils | 0.3 %  | [6] |
| 149 | (E)-β-Ocimene        | C <sub>10</sub> H <sub>16</sub>   | <i>D. gonatopodus</i> | leaves | Essential oils | 0.2 %  | [6] |

|                                                                             |                                      |                                                |                       |        |                |        |     |
|-----------------------------------------------------------------------------|--------------------------------------|------------------------------------------------|-----------------------|--------|----------------|--------|-----|
| 150                                                                         | Linalool                             | C <sub>10</sub> H <sub>18</sub> O              | <i>D. gonatopodus</i> | leaves | Essential oils | trace  | [6] |
| 151                                                                         | β-Cubebene                           | C <sub>15</sub> H <sub>24</sub>                | <i>D. gonatopodus</i> | leaves | Essential oils | trace  | [6] |
| 152                                                                         | β-Elemene                            | C <sub>15</sub> H <sub>24</sub>                | <i>D. gonatopodus</i> | leaves | Essential oils | trace  | [6] |
| 153                                                                         | γ-Gurjunene                          | C <sub>15</sub> H <sub>24</sub>                | <i>D. gonatopodus</i> | leaves | Essential oils | trace  | [6] |
| 154                                                                         | ( <i>E</i> )-β-Ionone                | C <sub>13</sub> H <sub>20</sub> O              | <i>D. gonatopodus</i> | leaves | Essential oils | trace  | [6] |
| 155                                                                         | <i>trans</i> -Muuroala-4(14),5-diene | C <sub>15</sub> H <sub>24</sub>                | <i>D. gonatopodus</i> | leaves | Essential oils | trace  | [6] |
| 160                                                                         | Ledene viridiflorene                 | C <sub>15</sub> H <sub>24</sub>                | <i>D. gonatopodus</i> | leaves | Essential oils | trace  | [6] |
| 161                                                                         | β-Calacorene                         | C <sub>15</sub> H <sub>20</sub>                | <i>D. gonatopodus</i> | leaves | Essential oils | trace  | [6] |
| 162                                                                         | Isoledene                            | C <sub>15</sub> H <sub>24</sub>                | <i>D. gonatopodus</i> | leaves | Essential oils | trace  | [6] |
| 163                                                                         | α-Gurjunene                          | C <sub>15</sub> H <sub>24</sub>                | <i>D. gonatopodus</i> | leaves | Essential oils | trace  | [6] |
| 164                                                                         | Viridiflorene                        | C <sub>15</sub> H <sub>24</sub>                | <i>D. gonatopodus</i> | leaves | Essential oils | trace  | [6] |
| 165                                                                         | Epiglobulol                          | C <sub>15</sub> H <sub>26</sub> O              | <i>D. gonatopodus</i> | leaves | Essential oils | trace  | [6] |
| 166                                                                         | Ledol                                | C <sub>15</sub> H <sub>26</sub> O              | <i>D. gonatopodus</i> | leaves | Essential oils | trace  | [6] |
| 167                                                                         | Viridiflorol                         | C <sub>15</sub> H <sub>26</sub> O              | <i>D. gonatopodus</i> | leaves | Essential oils | trace  | [6] |
| 168                                                                         | Palustrol                            | C <sub>15</sub> H <sub>26</sub> O              | <i>D. gonatopodus</i> | leaves | Essential oils | trace  | [6] |
| <b><i>D. capillaris</i></b> (% of constituent of the essential oil (12 mg)) |                                      |                                                |                       |        |                |        |     |
| 169                                                                         | 6-3-Carene                           | C <sub>10</sub> H <sub>16</sub>                | <i>D. capillaris</i>  | leaves | Essential oils | 44.7 % | [7] |
| 170                                                                         | Daucene                              | C <sub>15</sub> H <sub>24</sub>                | <i>D. capillaris</i>  | leaves | Essential oils | 17.1 % | [7] |
| 171                                                                         | Dauca-5,8-diene                      | C <sub>15</sub> H <sub>24</sub>                | <i>D. capillaris</i>  | leaves | Essential oils | 12.9 % | [7] |
| <b><i>D. Chevalieri</i></b>                                                 |                                      |                                                |                       |        |                |        |     |
| 172                                                                         | Palmitic acid                        | C <sub>16</sub> H <sub>32</sub> O <sub>2</sub> | <i>D. Chevalieri</i>  | Roots  | N/A            | N/A    | [8] |
| 173                                                                         | Dibutylphthalate                     | C <sub>16</sub> H <sub>22</sub> O <sub>4</sub> | <i>D. Chevalieri</i>  | Roots  | N/A            | N/A    | [8] |
| 174                                                                         | Coniferaldehyde                      | C <sub>10</sub> H <sub>10</sub> O <sub>3</sub> | <i>D. Chevalieri</i>  | Roots  | N/A            | N/A    | [8] |
| 175                                                                         | Scopoletin                           | C <sub>10</sub> H <sub>8</sub> O <sub>4</sub>  | <i>D. Chevalieri</i>  | Roots  | N/A            | N/A    | [8] |
| 176                                                                         | β-hydroxypropiovanillone             | C <sub>10</sub> H <sub>12</sub> O <sub>4</sub> | <i>D. Chevalieri</i>  | Roots  | N/A            | N/A    | [8] |
| 177                                                                         | (+)-Pinoresinol                      | C <sub>20</sub> H <sub>22</sub> O <sub>6</sub> | <i>D. Chevalieri</i>  | Roots  | N/A            | N/A    | [8] |



|     |                    |                                                |                      |       |     |     |     |
|-----|--------------------|------------------------------------------------|----------------------|-------|-----|-----|-----|
| 178 | (+)-Syringaresinol | C <sub>22</sub> H <sub>26</sub> O <sub>8</sub> | <i>D. Chevalieri</i> | Roots | N/A | N/A | [8] |
|-----|--------------------|------------------------------------------------|----------------------|-------|-----|-----|-----|

12

13

Table S2. The main bioactive compounds of *Dendropanax* species and its pharmacological activities

| Compound              | Molecular structure                                                                | Plant species         | Activity Tested                             |
|-----------------------|------------------------------------------------------------------------------------|-----------------------|---------------------------------------------|
| <i>D. gonatopodus</i> |                                                                                    |                       |                                             |
| $\beta$ -Pinene       | 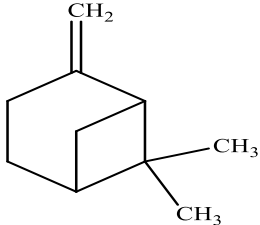 | <i>D. gonatopodus</i> | Anti-oxidant and anti-inflammatory activity |
| <i>p</i> -Cymene      |  | <i>D. gonatopodus</i> | Anti-oxidant and anti-inflammatory activity |

Limonene

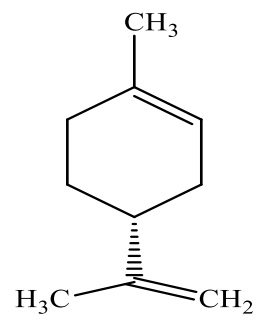*D. gonatopodus*

Anti-oxidant and antibacterial activity

*(E)*-β-Ocimene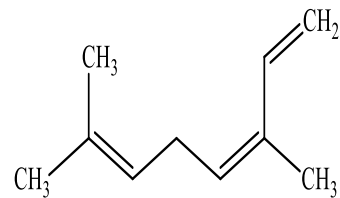*D. gonatopodus*

Anti-oxidant and antibacterial activity

Terpinolene

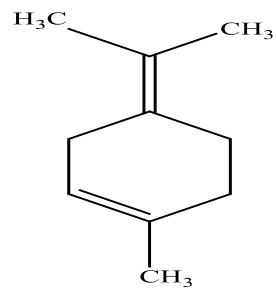*D. gonatopodus*

Antioxidant, antiviral, and larvicidal Activity

Linalool

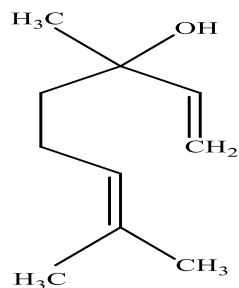*D. gonatopodus*

Anti-oxidant and antimicrobial Activity

*p*-Cymen-8-ol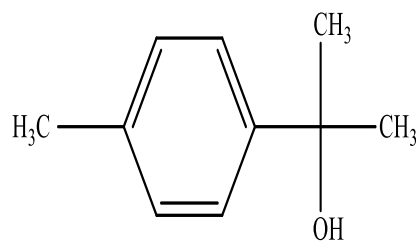*D. gonatopodus*

Antioxidant and antifungal activity

 $\alpha$ -Copaene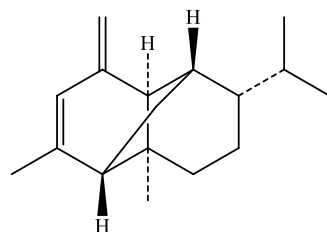*D. gonatopodus*

Antioxidant activity

 $\beta$ -Cubebene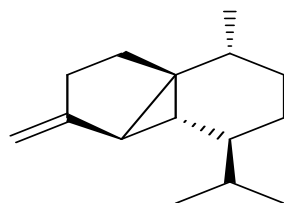*D. gonatopodus*

Antioxidant, antimicrobial and larvicidal activity

$\beta$ -Elemene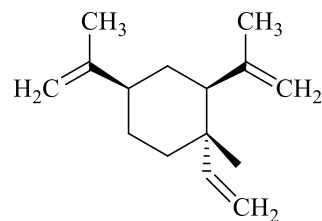*D. gonatopodus*

Anti-oxidant, anticancer, cytotoxicity and anti-inflammatory activity

 $\alpha$ -Humulene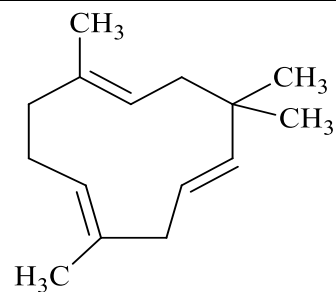*D. gonatopodus*

Anti-Inflammatory, antioxidant, antibiotic, and cytotoxic activity

(E)-Caryophyllene

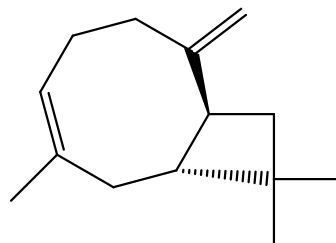*D. gonatopodus*

Anticancer, antioxidant and antimicrobial activity

 $\beta$ -Copaene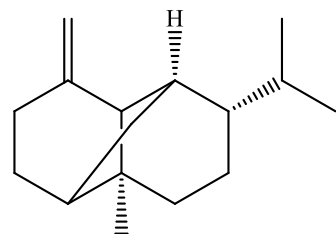*D. gonatopodus*

Antioxidant and antibacterial activity

Aromadendrene

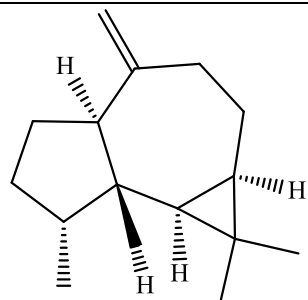

*D. gonatopodus*

Antibacterial and antioxidant activity

Alloaromadendrene

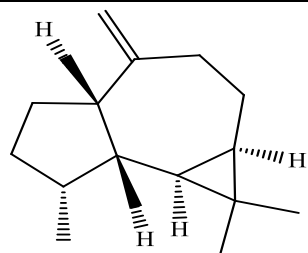

*D. gonatopodus*

Antineoplastic and antioxidant activity

Epiglobulol

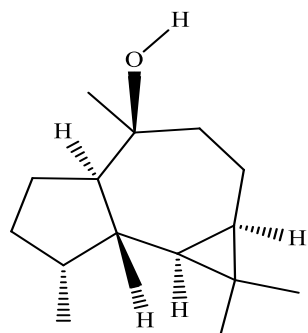

*D. gonatopodus*

Antibacterial and uterus relaxant activity

Viridiflorol

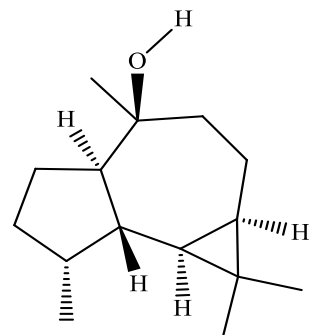

*D. gonatopodus*

Acetylcholinesterase inhibitory and antifungal activity

Globulol

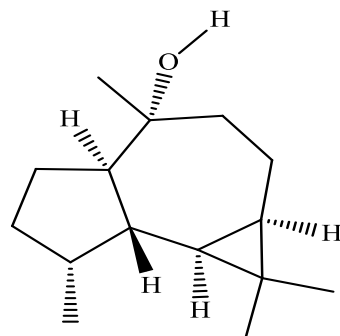

*D. gonatopodus*

Antibacterial, antifungal, antioxidant, sedative and anaesthetic activity

Spathulenol

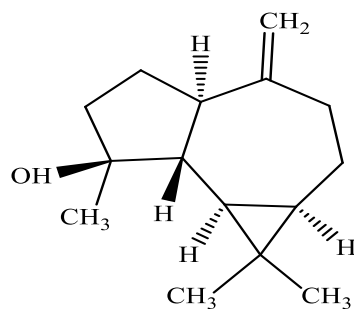

*D. gonatopodus*

Antibacterial, anticancer, anti-inflammatory, immunomodulatory and uterus relaxant activity

$\beta$ -Ionone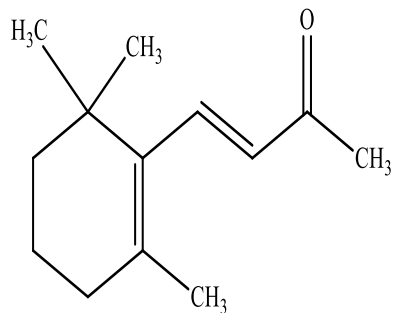*D. gonatopodus*

Anticancer and antioxidant activity

 $\gamma$ -Muurolene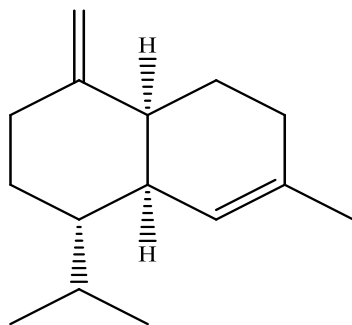*D. gonatopodus*

Antimicrobial and antiseptic activity

 $\gamma$ -Gurjunene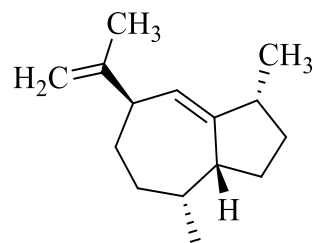*D. gonatopodus*

Antimicrobial and antiseptic activity

$\delta$ -Cadinene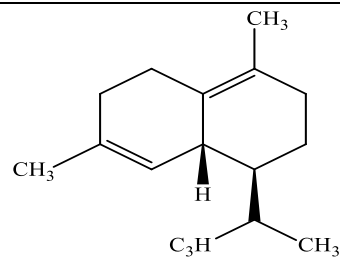*D. gonatopodus*

Antimicrobial and antiseptic activity

 $\alpha$ -Calacorene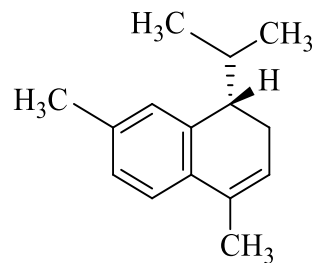*D. gonatopodus*

Antimicrobial and antiseptic activity

 $\gamma$ -Cadinene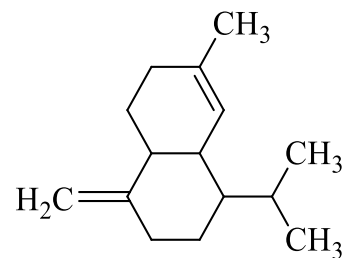*D. gonatopodus*

Antibacterial activity

t-Cadinol

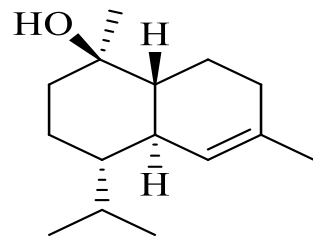*D. gonatopodus*

Antibacterial activity



---

*D. capillaris*

---

$\alpha$ -Cadinol

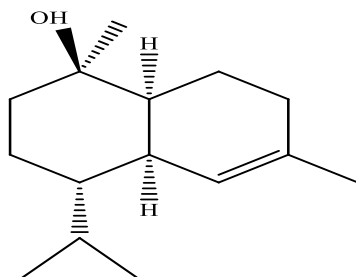

*D. capillaris*

Cytotoxicity

$\delta$ -3-Carene

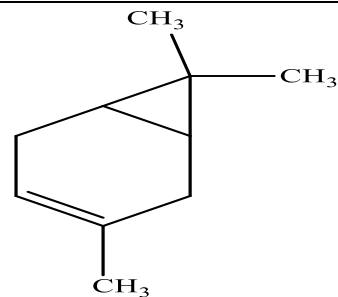

*D. capillaris*

Cytotoxicity

Dauca-5,8-diene

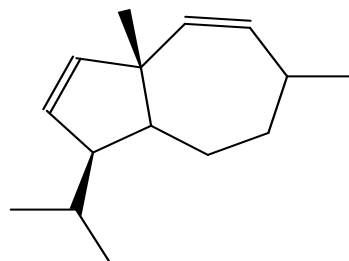

*D. capillaris*

Cytotoxicity

---

*D. Chevalieri*

---

Palmitic acid

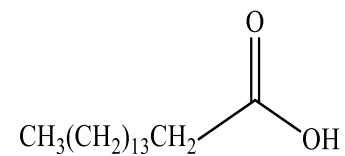*D. Chevalieri*

Anti-inflammatory,

Dibutyl phthalate

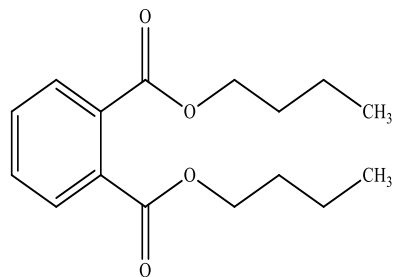*D. Chevalieri*

Anti-inflammatory,

Scopoletin

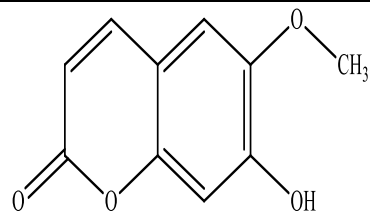*D. Chevalieri*

Anti-inflammatory,

 $\beta$ -hydroxypropiovanillone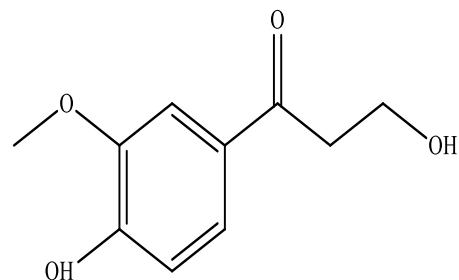*D. Chevalieri*

Anti-inflammatory,

(+)-Pinoresinol

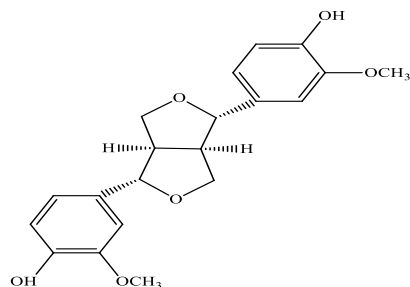

*D. Chevalieri*

Anti-inflammatory,

(+)-Syringaresinol

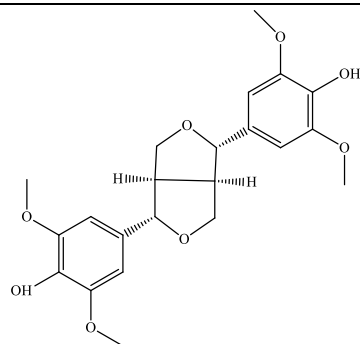

*D. Chevalieri*

Anti-inflammatory,

*D. arboreus*

Falcarinol

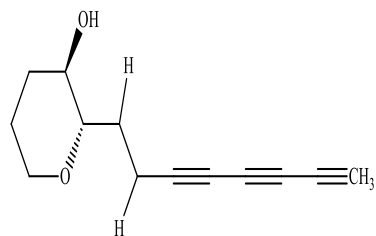

*D. arboreus*

Cytotoxicity

(3S)-16,17-didehydrofalcarinol

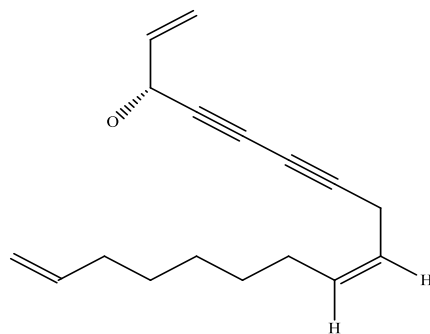

*D. arboreus*

Cytotoxicity

Dehydrofalcarinol-A

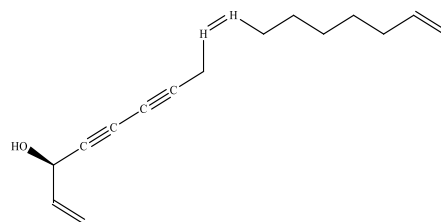

*D. arboreus*

Cytotoxicity

Dehydrofalcarindiol-B

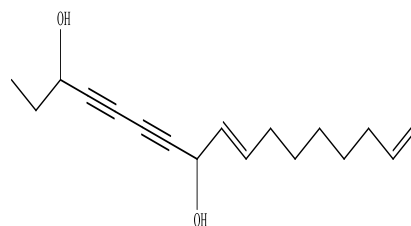

*D. arboreus*

Cytotoxicity

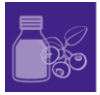

14 **References**

- 15 1. Bernart, M.W.; Cardellina, J.H.; Balaschak, M.S.; Alexander, M.R.; Shoemaker, R.H.; Boyd, M.R. Cytotoxic  
16 falcarinol oxylipins from *Dendropanax arboreus*. *J. Nat. Prod.* **1996**, *59*, 748–753.
- 17 2. Setzer, W.N.; Green, T.J.; Whitaker, K.W.; Moriarity, D.M.; Yancey, C.A.; Lawton, R.O.; Bates, R.B. A  
18 cytotoxic diacetylene from *Dendropanax arboreus*. *Planta Med.* **1995**, *61*, 470–471.
- 19 3. Pino, J.A.; Marbot, R.; Payo, A.; Chao, D.; Herrera, P.; Martí, M.P. Leaf oil of *dendropanax arboreus* l. from  
20 Cuba. *J. Essent. Oil Res.* **2005**, *17*, 547–548.
- 21 4. Lai, Y.C.; Lee, S.S. Chemical constituents from *Dendropanax dentiger*. *Nat. Prod. Commun.* **2013**, *8*,  
22 1934578X1300800322.
- 23 5. Zheng, L.P.; He, Z.G.; Wu, Z.J.; Zhang, C. Chemical constituents from *Dendropanax dentiger*. *Chem. Nat.*  
24 *Compd.* **2012**, *48*, 883–885.
- 25 6. Setzer, W.N. Essential oil composition of *Dendropanax gonatopodus* from Monteverde, Costa Rica. An ab  
26 initio examination of aromadendrane sesquiterpenoids. *Nat. Prod. Commun.* **2008**, *3*, 1934578X0800300932.
- 27 7. Richmond, J.D.; Agius, B.R.; Wright, B.S.; Haber, W.A.; Moriarity, D.M.; Setzer, W.N. Essential oil  
28 compositions and cytotoxic activities of *Dendropanax capillaris*, *Oreopanax nubigenus*, and *Schefflera*  
29 *rodrigueziana* from Monteverde, Costa Rica. *Nat. Prod. Commun.* **2009**, *4*, 1934578X0900400221.
- 30 8. Ren, G.; Luo, Z.P.; Huang, H.L.; Shao, F.; Li, G.H.; Zhou, C.X.; Liu, R.H. [Study on the chemical  
31 constituents of the roots of *Dendropanax chevalieri*]. *Zhong Yao Cai* **2012**, *35*, 62–64.
- 32

33
